# Supplementary material for: Testing of rapid evaporative mass spectrometry for histological tissue classification and molecular diagnostics in a multi-site study
Source: PubMed Central journal article supplement (PMC11473823; doi:10.1038/s41416-024-02739-y), 2024-09-18
Supplement: 41416_2024_2739_MOESM1_ESM.pdf [file 41416_2024_2739_MOESM1_ESM.pdf]

**Testing of Rapid Evaporative Mass Spectrometry for Histological Tissue Classification and Molecular  
Diagnostics in a Multi-site Study**

Martin Kaufmann,<sup>1,2</sup> Pierre-Maxence Vaysse,<sup>3,4,5</sup> Adele Savage,<sup>6</sup> Loes F.S. Kooreman,<sup>7,8</sup> Natasja Janssen,<sup>9</sup> Sonal Varma,<sup>10</sup> Kevin Yi Mi Ren<sup>10</sup>, Shaila Merchant,<sup>1</sup> Cecil Jay Engel,<sup>1</sup> Steven W.M. Olde Damink,<sup>4,11,12</sup> Marjolein L. Smidt,<sup>4,8</sup> Sami Shousha,<sup>13</sup> Hemali Chauhan,<sup>6</sup> Evdoxia Karali,<sup>14</sup> Emine Kazanc,<sup>14</sup> George Poulogiannis,<sup>14</sup> Gabor Fichtinger,<sup>9</sup> Boglárka Tauber,<sup>15</sup> Daniel R. Leff,<sup>16</sup> Steven D. Pringle,<sup>17</sup> John F. Rudan,<sup>1</sup> Ron M.A. Heeren,<sup>3</sup> Tiffany Porta Siegel,<sup>3</sup> Zoltán Takáts,<sup>6</sup> Júlia Balog,<sup>6,18\*</sup>

<sup>1</sup> Department of Surgery, Queen's University, Kingston, ON, Canada

<sup>2</sup> Gastrointestinal Diseases Research Unit, Kingston Health Sciences Centre, Kingston ON, Canada

<sup>3</sup> Maastricht MultiModal Molecular Imaging (M4I) Institute, Division of Imaging Mass Spectrometry, Maastricht University, Maastricht, NL

<sup>4</sup> Department of Surgery, Maastricht University Medical Center + (MUMC+), NL

<sup>5</sup> Department of Otorhinolaryngology, Head & Neck Surgery, MUMC+, NL

<sup>6</sup> Division of Systems Medicine, Department of Metabolism, Digestion and Reproduction, Imperial College London, London, UK

<sup>7</sup> Department of Pathology, MUMC+, NL

<sup>8</sup> GROW School for Oncology and Reproduction, MUMC+, NL

<sup>9</sup> School of Computing, Queen's University, Kingston ON, Canada

<sup>10</sup> Department of Pathology, Queen's University, Kingston ON, Canada

<sup>11</sup> Department of General, Visceral and Transplantation Surgery, RWTH University Hospital Aachen, Aachen, Germany

<sup>12</sup> NUTRIM School of Nutrition and Translational Research in Metabolism Faculty of Health, Maastricht University, NL

<sup>13</sup> Imperial NHS Trust, London, UK

<sup>14</sup> Signalling and Cancer Metabolism Team, The Institute of Cancer Research, London, UK

<sup>15</sup> Qamcom Research & Technology Central Europe, Budapest, Hungary

<sup>16</sup> Department of Surgery and Cancer, Biosurgery and Surgical Technology, Imperial College London, London, UK

<sup>17</sup> Waters Corporation, Wilmslow, UK

<sup>18</sup> Waters Research Center, Budapest, Hungary

\* Corresponding author: Júlia Balog, PhD. Waters Research Center H-1031 Budapest, HU, +3630203352, Julia\_balog@waters.com

**Contents:**

|                                                                     |   |
|---------------------------------------------------------------------|---|
| Figure S1: Histopathology annotation of specimens analyzed by REIMS | 3 |
| Figure S2: Classification of pork liver spectra by site             | 4 |
| Figure S3: Chemical contamination in low-abundance <i>m/z</i> bins  | 5 |

## Contents (continued):

|                                                                                                                                                                  |    |
|------------------------------------------------------------------------------------------------------------------------------------------------------------------|----|
| Figure S4: Similarity of pork liver spectra among analysts                                                                                                       | 6  |
| Figure S5: REIMS spectra from human breast tissue samples (cut)                                                                                                  | 7  |
| Figure S6: REIMS spectra from human breast tissue (coagulation)                                                                                                  | 8  |
| Figure S7: Site-based comparison of spectra from clinical samples ( $m/z$ 600-1000)                                                                              | 9  |
| Figure S8: Site-based comparison of spectra from clinical samples ( $m/z$ 100-1000)                                                                              | 10 |
| Figure S9: Differentially-abundant ions in cut as compared with coagulation mode                                                                                 | 11 |
| Figure S10: Examples of misclassified spectra                                                                                                                    | 12 |
| Table S1: Characterization of selected fatty acids in normal adipose and invasive breast cancer stratified by <i>PIK3CA</i> mutation and hormone receptor status | 13 |
| Figure S11: Fatty acid metabolism in breast tissue stratified by hormone receptor status                                                                         | 14 |

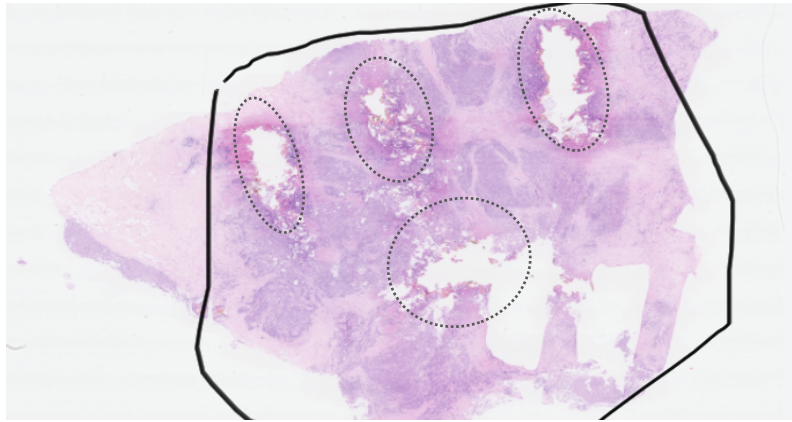

**Supplementary Figure S1: Histopathology annotation of specimens analyzed by REIMS.** Representative H&E micrograph of a human breast specimen analyzed by REIMS at C1. The solid line indicates the overall area determined to contain 90% invasive breast cancer. The areas encircled by dotted lines, indicate 4 specific regions sampled by REIMS in a single specimen.

**A**

|            |    | predicted label |     |    |    |
|------------|----|-----------------|-----|----|----|
|            |    | C1              | C2  | C4 | C2 |
| true label | C1 | 99              | 0   | 0  | 0  |
|            | C2 | 1               | 108 | 0  | 3  |
|            | C3 | 1               | 0   | 89 | 0  |
|            | C4 | 1               | 1   | 0  | 78 |

  

| $m/z$<br>(bin) <sup>1</sup> | $m/z$<br>measured | Rank <sup>2</sup> |
|-----------------------------|-------------------|-------------------|
| 979.75                      | 979.73            | 205               |
| 740.55                      | 740.52            | 67                |
| 982.75                      | 982.76            | 217               |
| 730.55                      | 730.54            | 222               |
| 960.65                      | NA                | 607               |
| 835.55                      | 835.56            | 84                |
| 847.55                      | 847.56            | 139               |
| 780.55                      | 780.56            | 176               |
| 934.65                      | NA                | 541               |
| 943.65                      | NA                | 602               |

**B**

|            |    | predicted label |     |    |    |
|------------|----|-----------------|-----|----|----|
|            |    | C1              | C3  | C4 | C2 |
| true label | C1 | 90              | 2   | 6  | 1  |
|            | C3 | 0               | 108 | 0  | 4  |
|            | C4 | 0               | 1   | 89 | 0  |
|            | C2 | 1               | 7   | 0  | 72 |

  

| $m/z$<br>(bin) <sup>1</sup> | $m/z$<br>measured | Rank <sup>3</sup> |
|-----------------------------|-------------------|-------------------|
| 811.45                      | NA                | 397               |
| 512.45                      | 512.47            | 97                |
| 780.55                      | 780.56            | 246               |
| 756.55                      | 756.56            | 387               |
| 730.55                      | 730.54            | 327               |
| 746.55                      | 746.55            | 130               |
| 661.45                      | 661.49            | 482               |
| 716.55                      | 716.52            | 77                |
| 689.55                      | 689.52            | 342               |
| 957.75                      | 957.56            | 1005              |

<sup>1</sup> Most abundant  $m/z$  bin from each of 10 groups of correlated bins selected by HSIC LASSO.

<sup>2</sup> Rank (bin number) based on relative abundance over 5000 bins ( $m/z$  600-1000).

<sup>3</sup> Rank (bin number) based on relative abundance over 9000 bins ( $m/z$  100-1000).

### Supplementary Figure S2: Classification of pork liver spectra by site

REIMS spectra from pork liver quality control material could be accurately identified by site using a KNN classifier with cosine distance. Cross-validation by site is shown for both the  $m/z$  600-1000 mass range (98% accuracy) (A) or the  $m/z$  100-1000 mass range (94% accuracy) (B).  $M/z$  bins exhibiting the greatest site-based difference are shown, along with their rank by abundance.

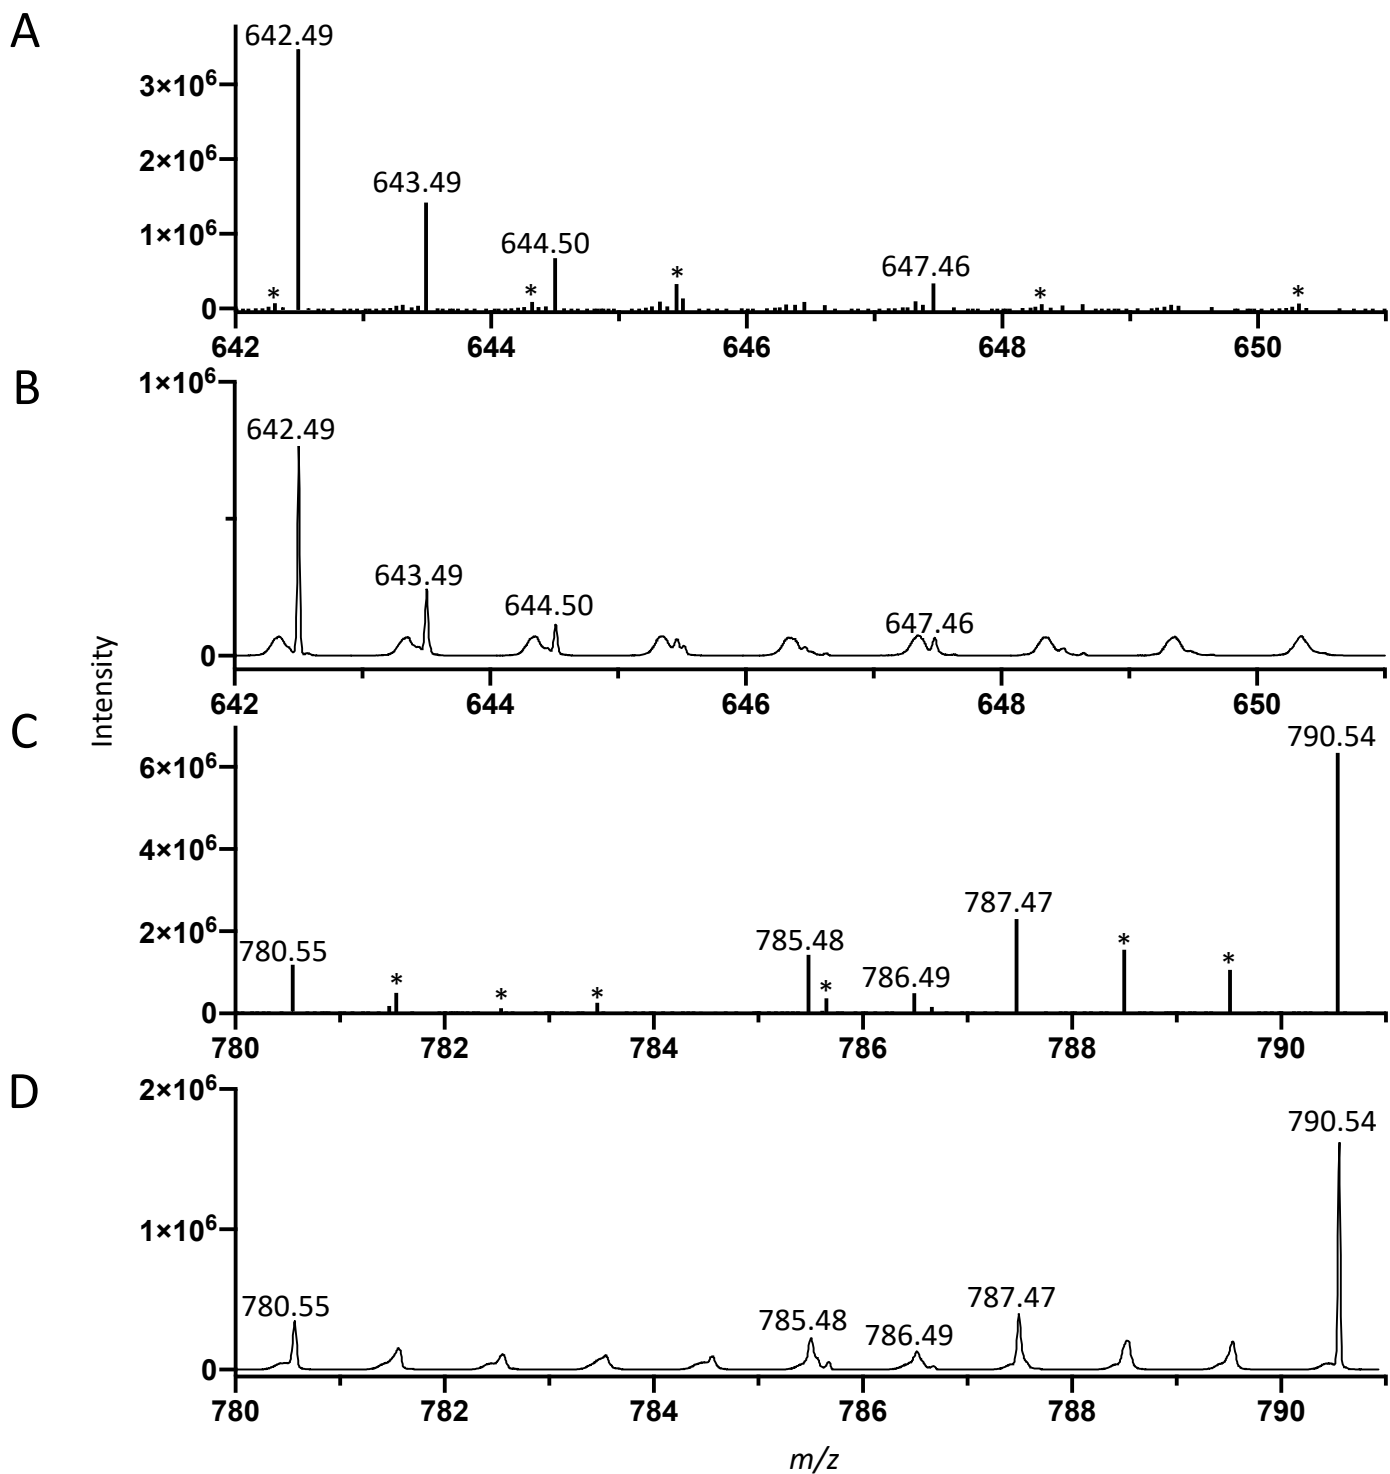

**Supplementary Figure S3: Chemical contamination in low-abundance  $m/z$  bins.**

Representative continuum and centroided spectra depicting specific  $m/z$  ranges from pork liver (A,B  $m/z$  642-651) and (C,D  $m/z$  780-791). Labeled peaks include low-abundance  $m/z$  ratios sufficiently resolved from chemical noise. However, peaks denoted with (\*) are insufficiently resolved from, or contain mostly chemical noise. Models/ selected features that are able to classify spectra by site may be over-fitted to certain  $m/z$  bins containing low abundance peaks and/or chemical noise.

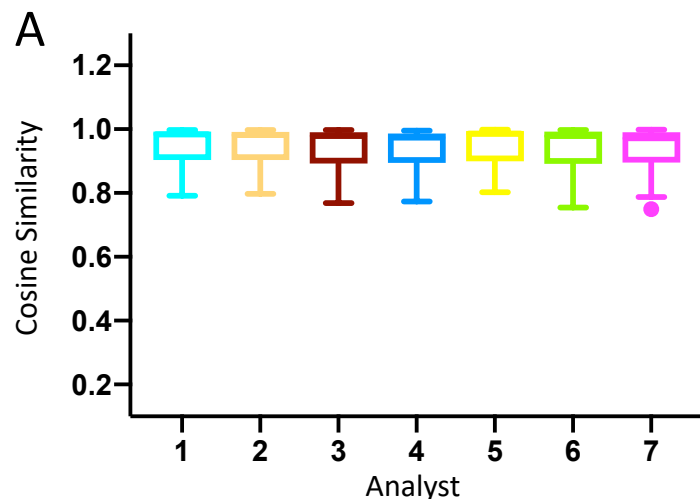

**B**

| Analysts compared | $p$<br>( $m/z$ 600-1000) <sup>1</sup> | Significance <sup>2</sup> |
|-------------------|---------------------------------------|---------------------------|
| 1/2               | 0.9715                                | NS                        |
| 1/3               | 0.1878                                | NS                        |
| 1/4               | 0.1415                                | NS                        |
| 1/5               | 0.8957                                | NS                        |
| 1/6               | 0.1433                                | NS                        |
| 1/7               | 0.0933                                | NS                        |
| 2/3               | 0.1911                                | NS                        |
| 2/4               | 0.1432                                | NS                        |
| 2/5               | 0.8657                                | NS                        |
| 2/6               | 0.1453                                | NS                        |
| 2/7               | 0.0939                                | NS                        |
| 3/4               | 0.9250                                | NS                        |
| 3/5               | 0.1513                                | NS                        |
| 3/6               | 0.8766                                | NS                        |
| 3/7               | 0.7254                                | NS                        |
| 4/5               | 0.1115                                | NS                        |
| 4/6               | 0.9458                                | NS                        |
| 4/7               | 0.7866                                | NS                        |
| 5/6               | 0.1143                                | NS                        |
| 5/7               | 0.0729                                | NS                        |
| 6/7               | 0.8472                                | NS                        |

<sup>1</sup>  $p$ -value for cosine similarity difference between analyst pairs over the  $m/z$  600-1000 range.

<sup>2</sup> Significance denoted by: NS, not significant ( $p > 0.05$ )

**Supplementary Figure S4: Similarity of pork liver spectra among analysts.**

Cosine similarity assessment of pork liver spectra acquired by seven analysts at C3, as compared with the C3's quality control spectra (A). Differences in cosine similarity values between analysts were not significant (B).

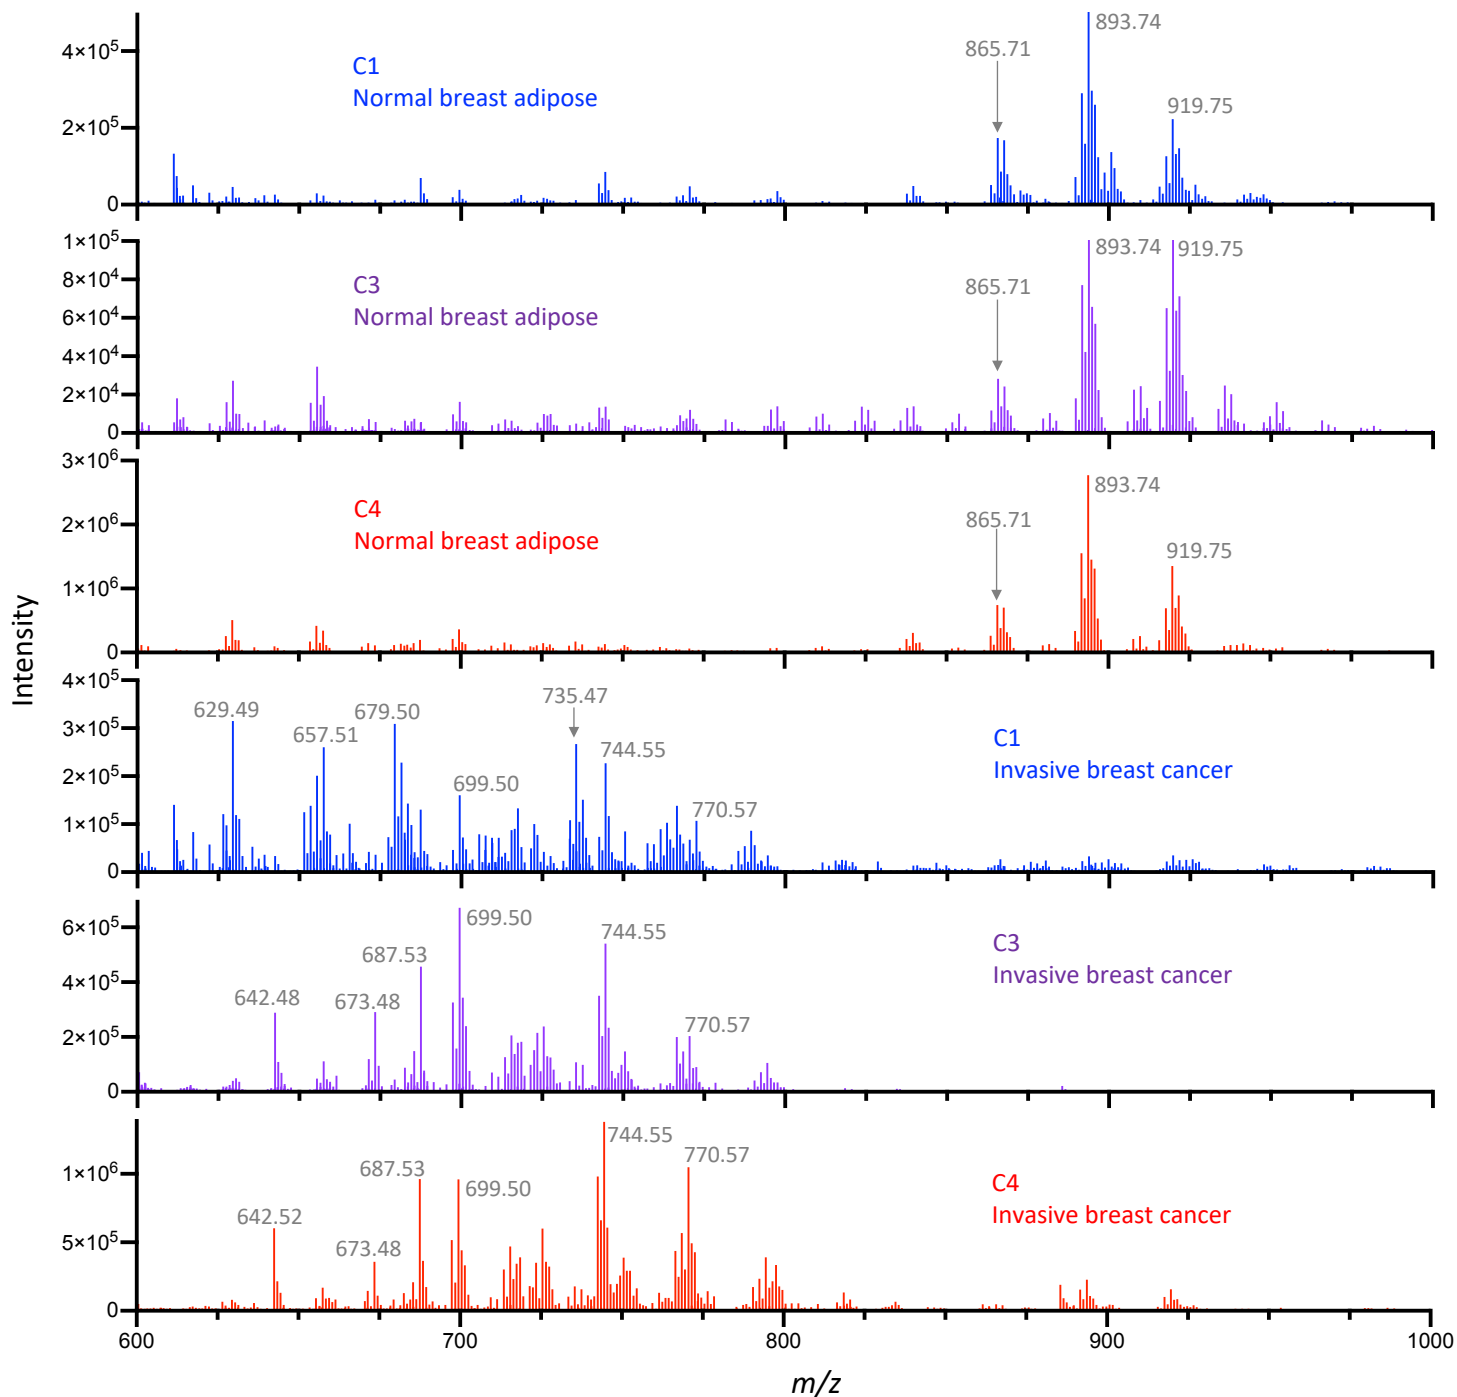

**Supplementary Figure S5: REIMS spectra from human breast tissue samples (cut).**

Representative REIMS spectra acquired in cut mode from either normal adipose or invasive breast cancer samples acquired from patients being treated at the 3 Consortium sites affiliated with clinical centers. The spectra shown are 1s scans acquired using cut mode, subjected to background subtraction and lockmass correction. The tissue type was determined by a breast pathologist at each site.

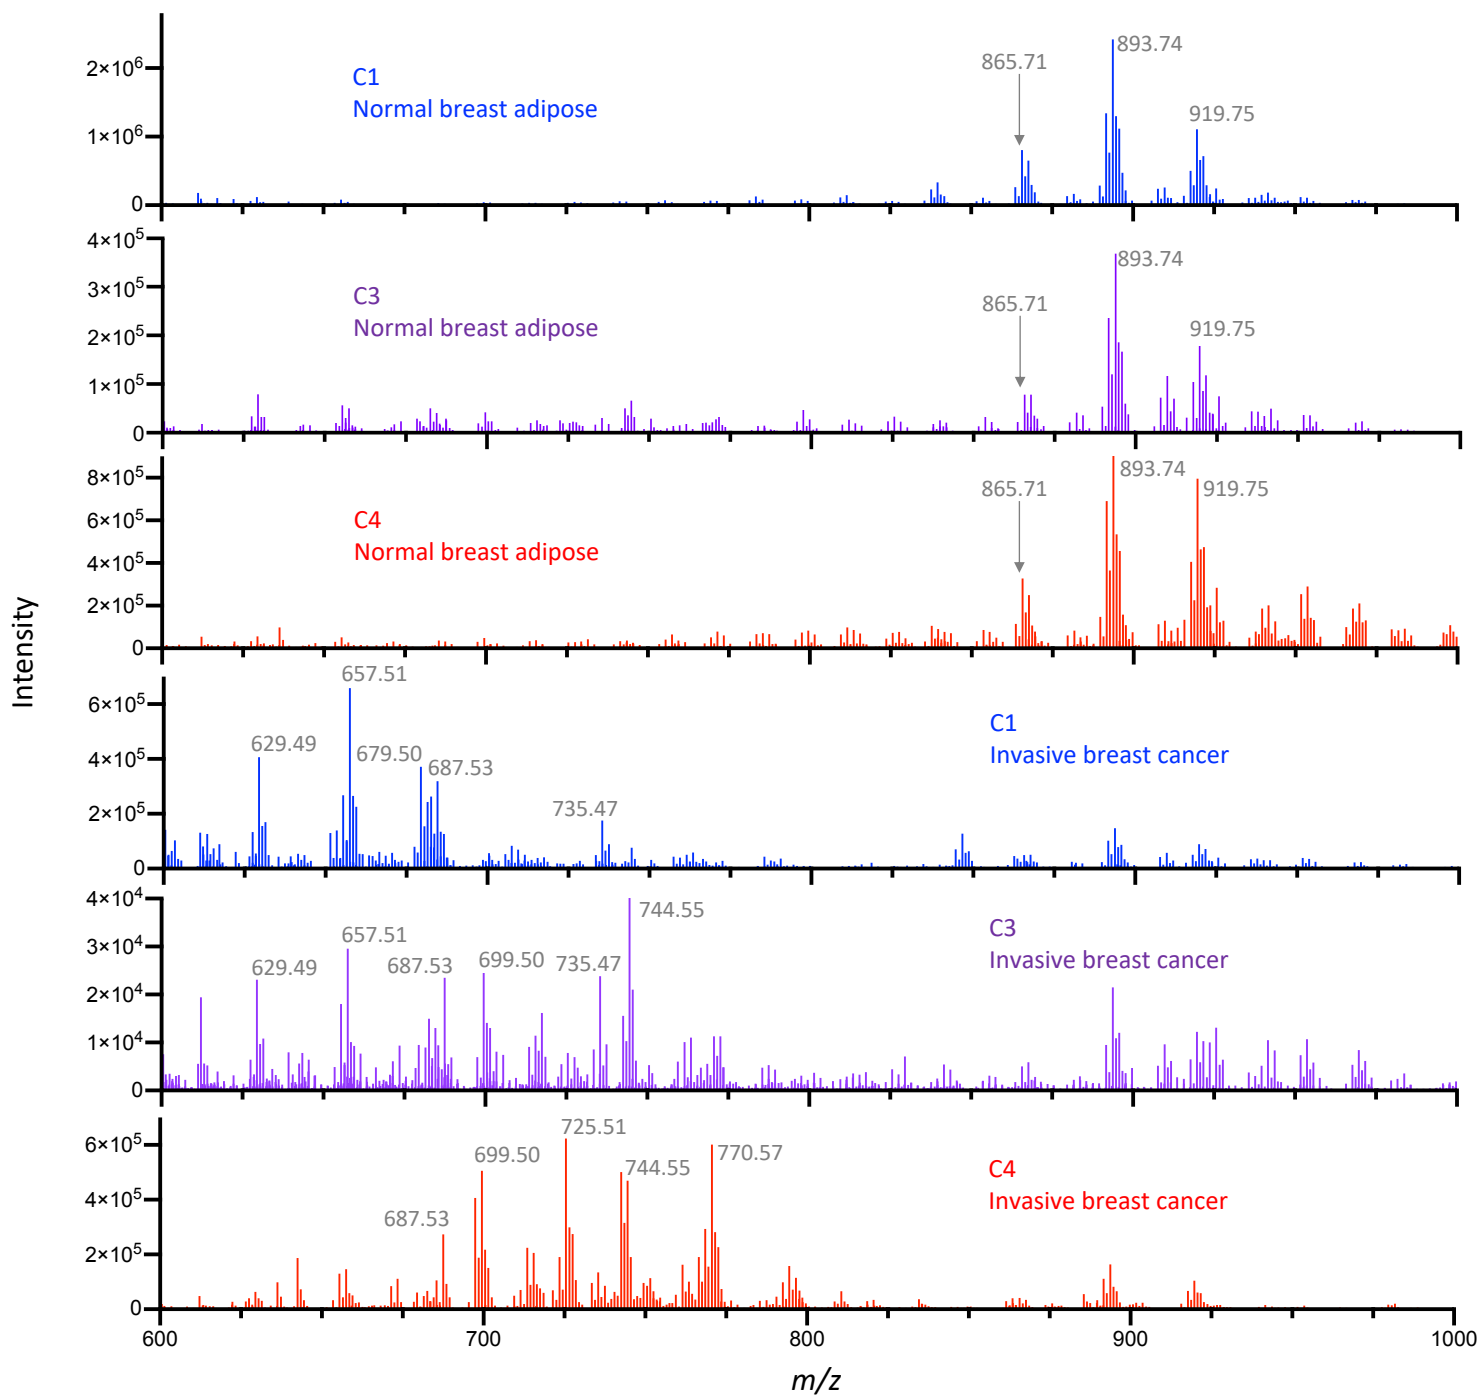

**Supplementary Figure S6: REIMS spectra from human breast tissue samples (Coag).**

Representative REIMS spectra acquired in coagulation mode from either normal adipose or invasive breast cancer samples acquired from patients being treated at the 3 Consortium sites affiliated with clinical centers. The spectra shown are 1s scans acquired using coagulation mode, subjected to background subtraction and lockmass correction. The tissue type was determined by a breast pathologist at each site.



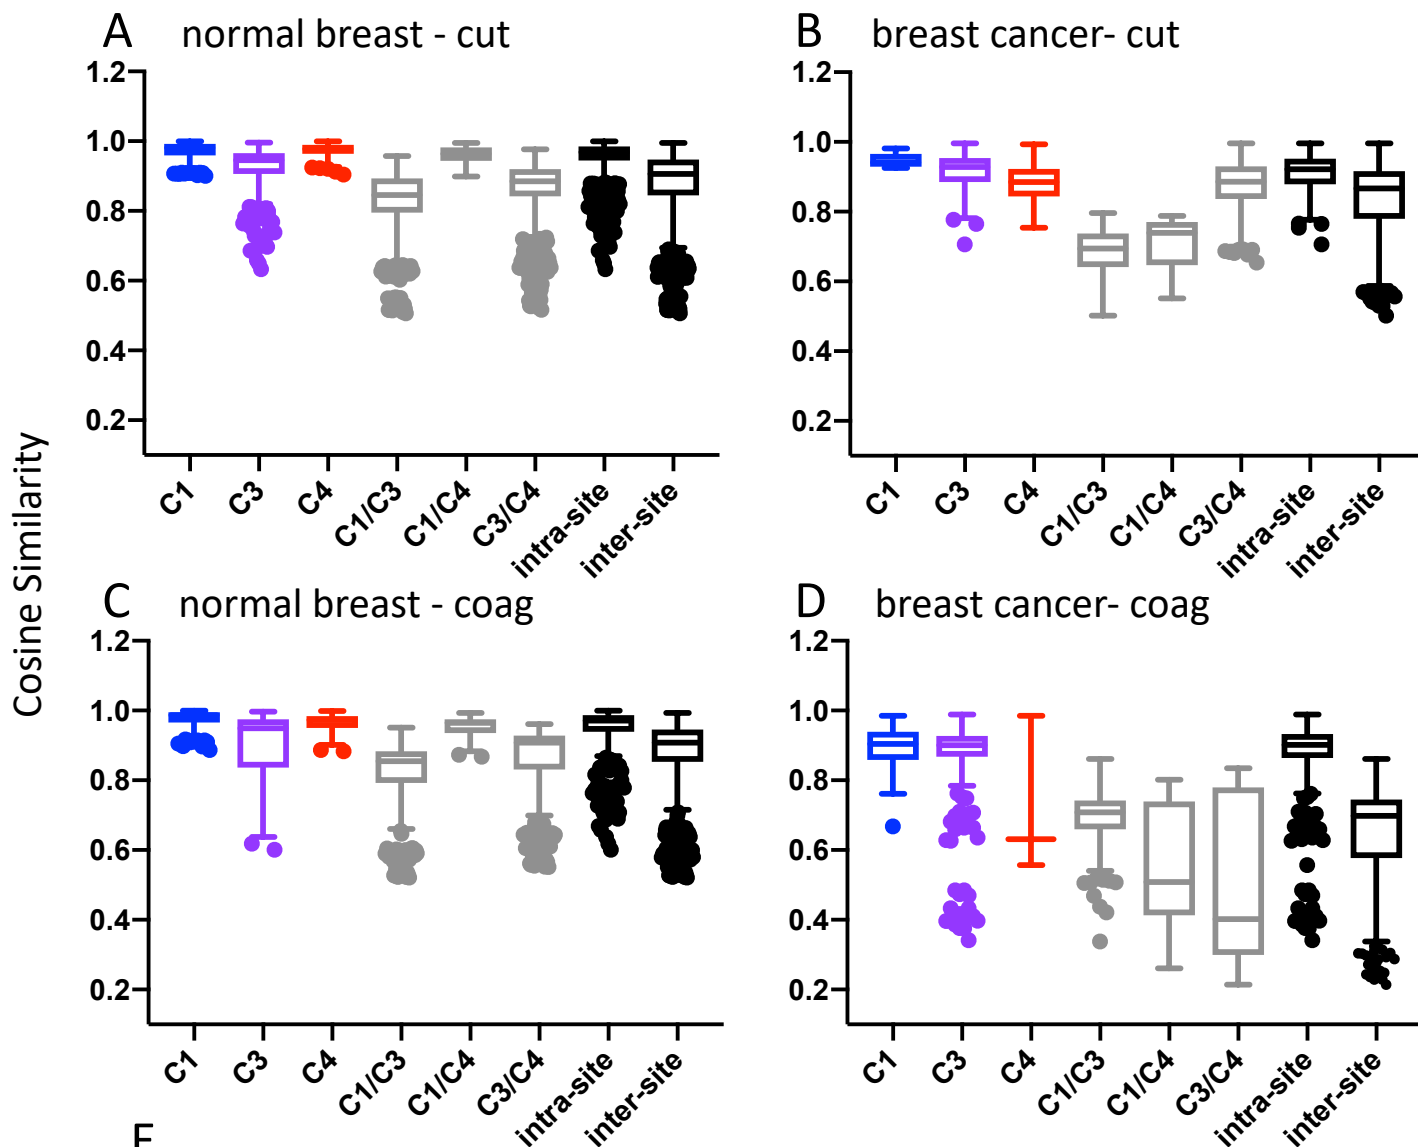

| Normal breast                   |                   |                                  |                   | Breast cancer                   |                   |                                  |                   |
|---------------------------------|-------------------|----------------------------------|-------------------|---------------------------------|-------------------|----------------------------------|-------------------|
| $m/z$ bin <sup>1</sup><br>(cut) | Rank <sup>2</sup> | $m/z$ bin <sup>1</sup><br>(coag) | Rank <sup>2</sup> | $m/z$ bin <sup>1</sup><br>(cut) | Rank <sup>2</sup> | $m/z$ bin <sup>1</sup><br>(coag) | Rank <sup>2</sup> |
| 891.72                          | 2                 | 875.77                           | 441               | 787.55*                         | 276               | 952.73                           | 562               |
| 931.75*                         | 309               | 867.71                           | 10                | 981.85*                         | 906               | 706.55*                          | 872               |
| 891.65*                         | 34                | 916.75*                          | 53                | 901.78                          | 262               | 906.75*                          | 3050              |
| 913.65*                         | 169               | 743.52                           | 83                | 925.78                          | 297               | 744.45*                          | 1719              |
| 893.65*                         | 77                | 905.70                           | 162               | 923.76                          | 228               | 676.45*                          | 2450              |
| 929.75*                         | 291               | 825.55*                          | 189               | 787.55*                         | 276               | 967.35*                          | 4291              |
| 865.70                          | 14                | 781.65*                          | 360               | 679.55*                         | 94                | 742.54                           | 133               |
| 913.75*                         | 200               | 895.74                           | 5                 | 684.51                          | 86                | 951.65*                          | 824               |
| 915.72                          | 22                | 769.56                           | 78                | 927.85*                         | 429               | 935.35*                          | 4012              |
| 868.72                          | 17                | 891.72                           | 2                 | 756.45                          | 1378              | 979.73                           | 571               |

<sup>1</sup> Most abundant  $m/z$  bin (or corresponding measured mass when a peak was present) from each of 10 groups of correlated bins selected by HSIC LASSO. Absence of a peak is denoted by \*.

<sup>2</sup> Rank (bin number) based on relative abundance over 5000 bins ( $m/z$  600-1000).

### Supplementary Figure S7: Site-based comparison of spectra from clinical samples ( $m/z$ 600-1000).

Specific and overall intra-site and inter-site cosine similarities of spectra from normal breast (A,C) or breast cancer (B,D) are presented. Overall intra-site and inter-site cosine similarities were statistically significant for all tissue types and cautery modes. (E).  $M/z$  bins (or measured  $m/z$ ) exhibiting the greatest site-based difference are shown, along with their rank by abundance.

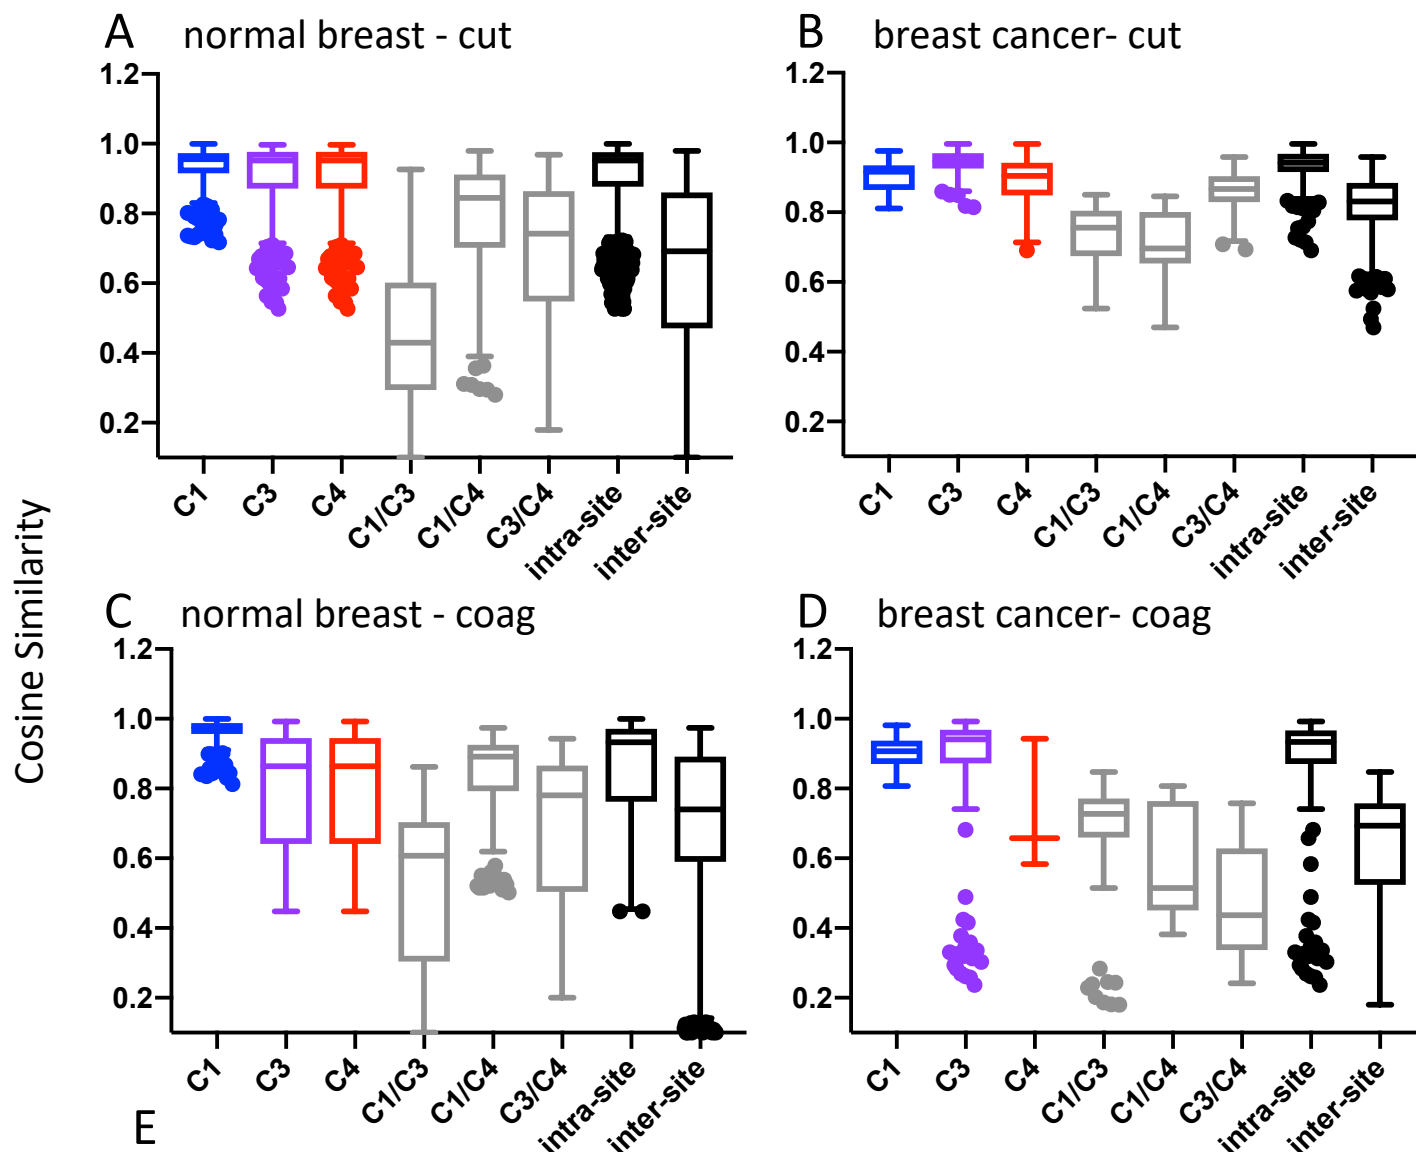

E

| Normal breast                   |      |                                  |      | Breast cancer                   |      |                                  |      |
|---------------------------------|------|----------------------------------|------|---------------------------------|------|----------------------------------|------|
| $m/z$ bin <sup>1</sup><br>(cut) | Rank | $m/z$ bin <sup>1</sup><br>(coag) | Rank | $m/z$ bin <sup>1</sup><br>(cut) | Rank | $m/z$ bin <sup>1</sup><br>(coag) | Rank |
| 391.22                          | 30   | 333.25*                          | 431  | 925.78                          | 1087 | 112.25*                          | 4025 |
| 903.75*                         | 554  | 867.71                           | 11   | 956.75*                         | 1865 | 951.65*                          | 824  |
| 929.75*                         | 903  | 916.75*                          | 68   | 331.15*                         | 434  | 675.45*                          | 535  |
| 318.15*                         | 458  | 269.15*                          | 257  | 163.09                          | 123  | 315.15*                          | 844  |
| 263.18                          | 20   | 627.55*                          | 852  | 262.05*                         | 860  | 952.74                           | 562  |
| 891.72                          | 4    | 808.65*                          | 1203 | 901.78                          | 976  | 864.69                           | 1455 |
| 915.72                          | 40   | 913.68                           | 98   | 279.65*                         | 4187 | 952.65*                          | 824  |
| 924.77                          | 92   | 599.45*                          | 376  | 262.05*                         | 860  | 262.05*                          | 333  |
| 973.85*                         | 1760 | 626.55*                          | 774  | 254.75*                         | 4524 | 885.55*                          | 1513 |
| 389.15*                         | 109  | 697.48                           | 119  | 330.15*                         | 817  | 469.35*                          | 975  |

<sup>1</sup> Most abundant  $m/z$  bin (or corresponding measured mass, when a peak was present) from each of 10 groups of correlated bins selected by HSIC LASSO. Absence of a peak is denoted by (\*).

<sup>2</sup> Rank (bin number) based on relative abundance over 9000 bins ( $m/z$  100-1000).

### Supplementary Figure S8: Site-based comparison of spectra from clinical samples ( $m/z$ 100-1000).

Specific and overall intra-site and inter-site cosine similarities of spectra from normal breast (A,C) or breast cancer (B,D) are presented. Overall intra-site and inter-site cosine similarities were statistically significant for all tissue types and cautery modes. (E).  $M/z$  bins (or measured  $m/z$ ) exhibiting the greatest site-based difference are shown, along with their rank by abundance.

## A normal breast

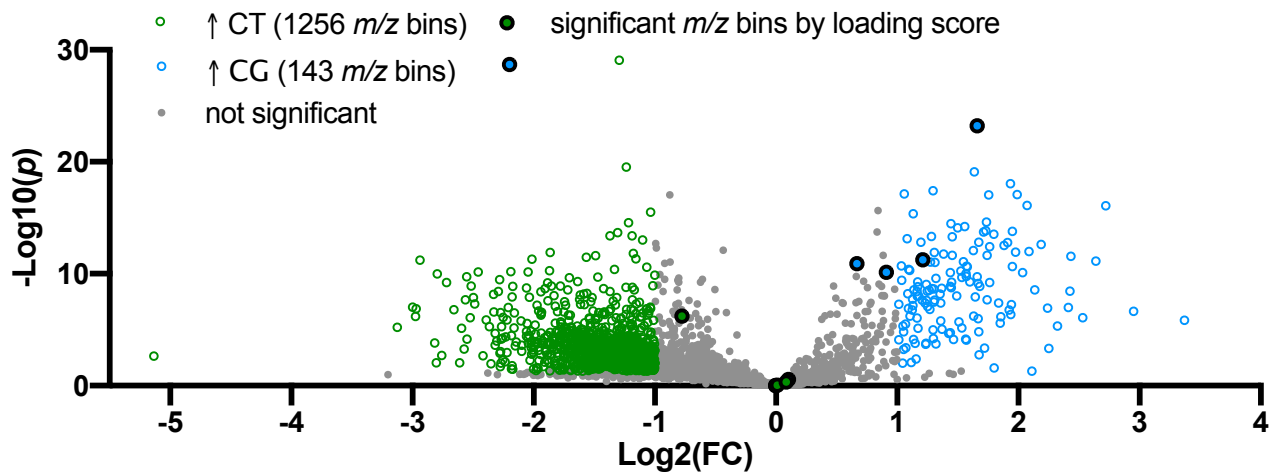

| $m/z$ bin <sup>1</sup> | Loading <sup>1</sup> | Log <sub>2</sub> (FC) | -Log <sub>10</sub> ( $p$ ) | Rank <sup>2</sup> | $m/z$ bin <sup>1</sup> | Loading <sup>1</sup> | Log <sub>2</sub> (FC) | -Log <sub>10</sub> ( $p$ ) | Rank <sup>2</sup> |
|------------------------|----------------------|-----------------------|----------------------------|-------------------|------------------------|----------------------|-----------------------|----------------------------|-------------------|
| 917.74                 | -0.27                | -0.003                | 0.009                      | 8                 | 909.77                 | 0.20                 | 0.6                   | 11                         | 15                |
| 657.55                 | -0.24                | -0.7                  | 6                          | 27                | 925.72                 | 0.17                 | 1.6                   | 23                         | 21                |
| 918.75                 | -0.20                | -0.003                | 0.008                      | 12                | 953.75                 | 0.15                 | 1.2                   | 11                         | 30                |
| 891.72                 | -0.18                | -0.08                 | 0.33                       | 2                 | 911.78                 | 0.13                 | 0.9                   | 10                         | 32                |
| 919.75                 | -0.16                | 0.01                  | 0.04                       | 3                 | 895.75                 | 0.12                 | 0.1                   | 0.5                        | 4                 |
| 744.55 <sup>3</sup>    | -0.07                | -0.7                  | 2                          | 42                | 893.74 <sup>3</sup>    | 0.11                 | 0.07                  | 0.3                        | 1                 |

## B breast cancer

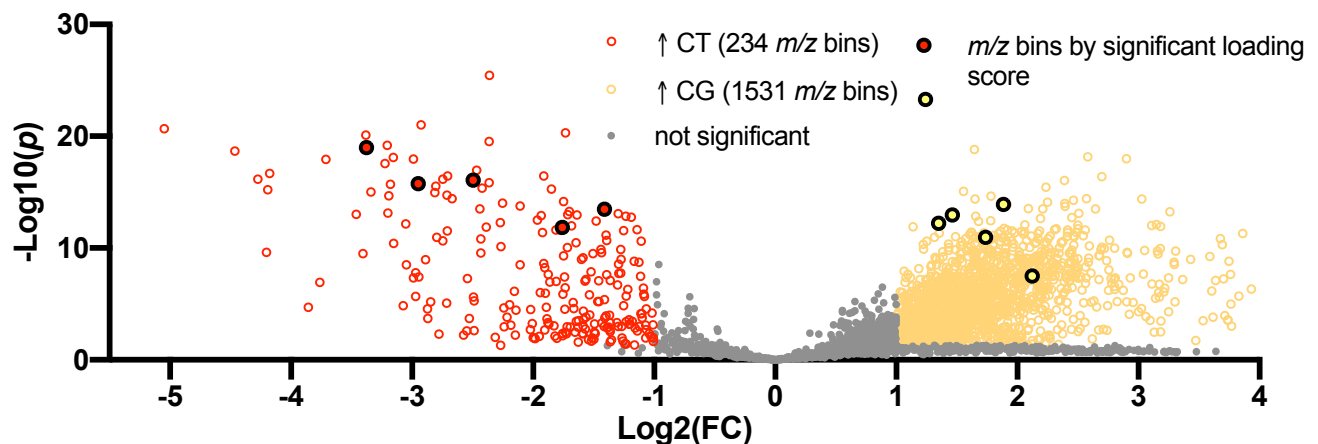

| $m/z$ bin <sup>1</sup> | Loading <sup>1</sup> | Log <sub>2</sub> (FC) | -Log <sub>10</sub> ( $p$ ) | Rank <sup>2</sup> | $m/z$ bin <sup>1</sup> | Loading <sup>1</sup> | Log <sub>2</sub> (FC) | -Log <sub>10</sub> ( $p$ ) | Rank <sup>2</sup> |
|------------------------|----------------------|-----------------------|----------------------------|-------------------|------------------------|----------------------|-----------------------|----------------------------|-------------------|
| 699.50                 | 0.36                 | -2.9                  | 15                         | 2                 | 657.51                 | -0.04                | 1.7                   | 11                         | 1                 |
| 744.55                 | 0.34                 | -1.4                  | 13                         | 1                 | 655.50                 | -0.006               | 1.9                   | 14                         | 7                 |
| 687.53                 | 0.21                 | -1.7                  | 22                         | 3                 | 682.59                 | -0.043               | 1.4                   | 12                         | 3                 |
| 699.55                 | 0.18                 | -2.5                  | 16                         | 6                 | 656.51                 | -0.021               | 1.5                   | 13                         | 10                |
| 697.48                 | 0.18                 | -3.3                  | 19                         | 19                | 681.52                 | -0.019               | 2.1                   | 8                          | 5                 |
| 744.55 <sup>3</sup>    | 0.34                 | -1.4                  | 13                         | 1                 | 893.75 <sup>3</sup>    | 0.52                 | 1.6                   | 3                          | 2                 |

<sup>1</sup>  $m/z$  measured mass selected on the five most significant PCA loading scores

<sup>2</sup> Rank (bin number) based on relative abundance over 5000 bins ( $m/z$  600-1000).

<sup>3</sup> For reference, parameters are shown for representative  $m/z$  bins that differentiate breast cancer from normal breast

**Supplementary Figure S9: Differentially-abundant ions in cut as compared with coagulation mode.** Volcano plots indicating the number of ions that significantly differ in abundance between cut (CT) and coagulation modes (CG), where  $p < 0.05$  and  $|\text{Log}_2(\text{FC})| > 1$ ; shown for normal breast (A) or breast cancer tissue (B).  $M/z$  bins with the most significant PCA loading scores are listed, and indicated on the volcano plot.

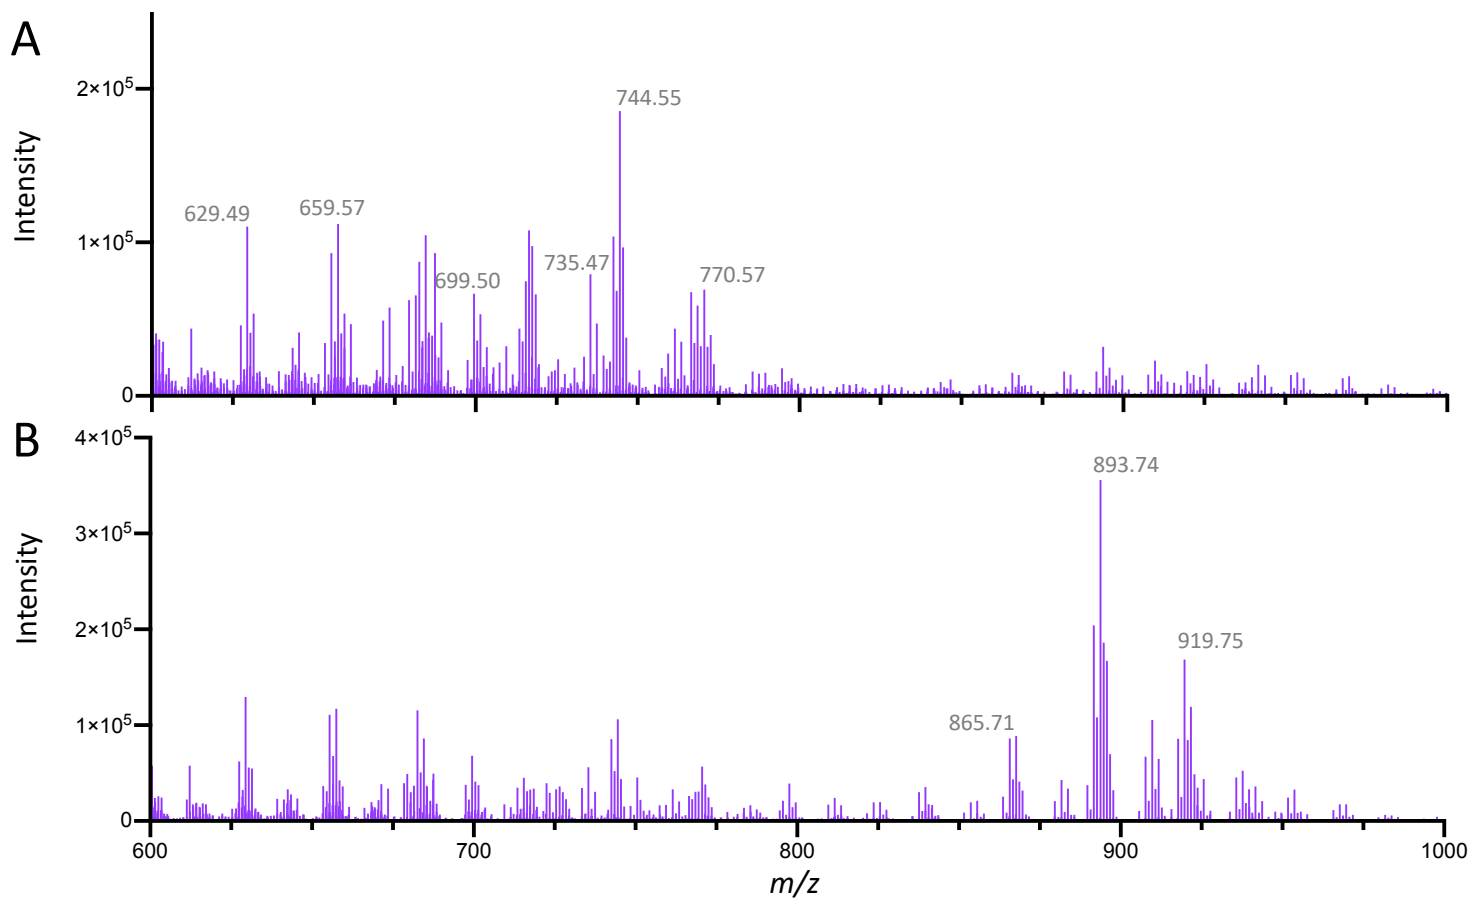

**Supplementary Figure S10: Examples of misclassified REIMS spectra.** The REIMS spectra above were acquired at C3 in coagulation mode, and were misclassified by the model created using data from C4. The spectrum in A was obtained from pathology-confirmed breast cancer tissue, but was misclassified as ‘normal’ (false negative). The spectrum in B was obtained from pathology-confirmed normal breast tissue but was misclassified as ‘breast cancer’ (false positive).

**Table S1: Characterization of selected fatty acids in normal adipose and invasive breast cancer stratified by *PIK3CA* mutation and hormone receptor status**

| Normal/<br>Cancer | Abundant in:            |                    | m/z<br>(bin) | m/z<br>(measured) | m/z<br>(theoretical) | m/z<br>(error, ppm) | Putative ID | Ion                |
|-------------------|-------------------------|--------------------|--------------|-------------------|----------------------|---------------------|-------------|--------------------|
|                   | <i>PIK3CA</i><br>Wt/Mut | ERPR+/<br>Triple - |              |                   |                      |                     |             |                    |
| Normal            | NS <sup>1</sup>         | NS                 | 281.25       | 281.248           | 281.2486             | 2.1                 | FA(18:1)    | [M-H] <sup>-</sup> |
| Normal            | Wt                      | ERPR+              | 279.25       | 279.234           | 279.2329             | 3.9                 | FA(18:2)    | [M-H] <sup>-</sup> |
| Cancer            | NS                      | NS                 | 307.25       | 307.264           | 307.2643             | 1.0                 | FA(20:2)    | [M-H] <sup>-</sup> |
| Cancer            | Mut                     | NS                 | 305.25       | 305.248           | 305.2486             | 2.0                 | FA(20:3)    | [M-H] <sup>-</sup> |
| Cancer            | NS                      | NS                 | 303.25       | 303.233           | 303.2329             | 0.3                 | FA(20:4)    | [M-H] <sup>-</sup> |
| Cancer            | NS                      | NS                 | 331.25       | 331.264           | 331.2643             | 0.9                 | FA(22:4)    | [M-H] <sup>-</sup> |
| Cancer            | Mut                     | NS                 | 329.25       | 329.249           | 329.2486             | 1.2                 | FA(22:5)    | [M-H] <sup>-</sup> |

<sup>1</sup>NS: not significant p>0.05

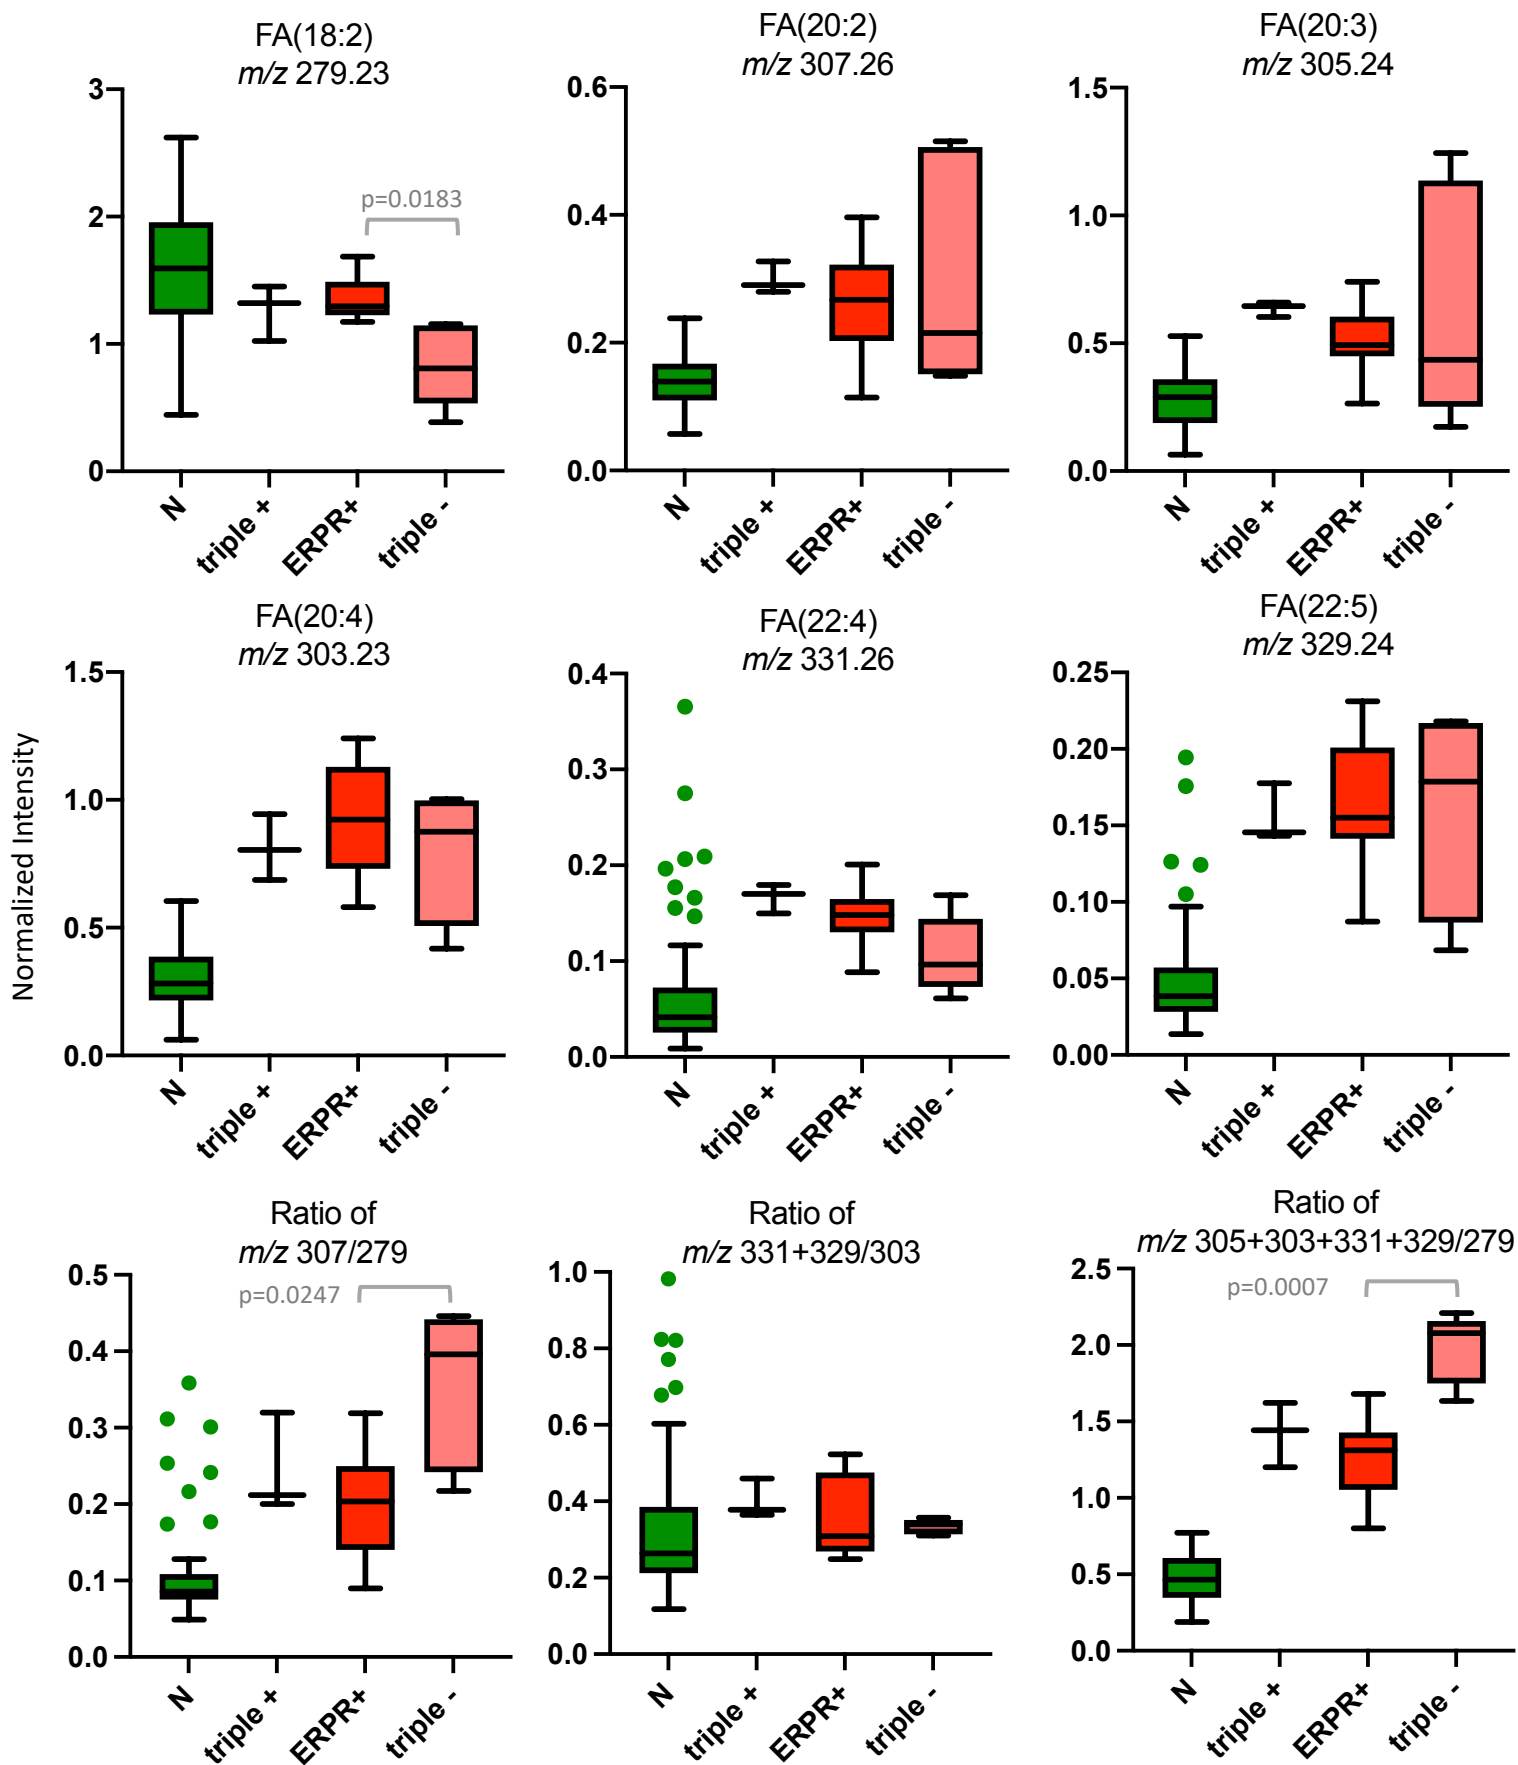

**Supplementary Figure S11: Fatty acid metabolism in breast tissue stratified by hormone receptor status.** Abundance of fatty acids (or ratios) is shown in triple positive (ER+, PR+,HER2, N=3), ERPR+ (ER+,PR+,HER2-, N=18), and triple – (ER-,PR-,HR-, N=5) breast cancer spectra, as compared with N (normal breast adipose, N=82).
